# Supplementary material
Source: PubMed Central journal article supplement (PMC4543535)
Supplement: NIHMS669040-supplement-1.pdf [file NIHMS669040-supplement-1.pdf]

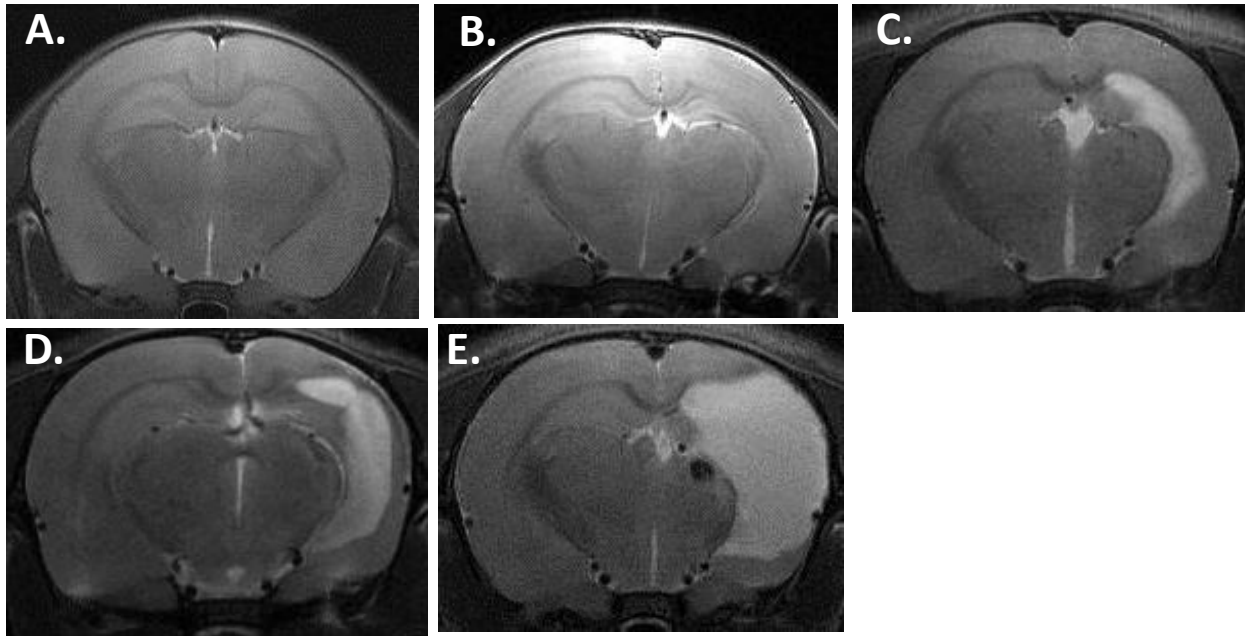

Supplemental Figure 2A, online: **Damage Score (DS) and Volume determinations from MRI.** 8 MRI images, 1 mm apart, from Bregma 2.52 to -5.40 were assigned a gross damage score based on an ordinal scale of 0-4, and the 8 scores were averaged to obtain the overall score for the brain. Shown are representative images from Bregma – 3.3. DS is assigned as: 0 = no damage; 1 = mild atrophy only; 2 = increased atrophy with ventriculomegaly; 3 = 1-25% infarct; 4 = 25-100% infarct.

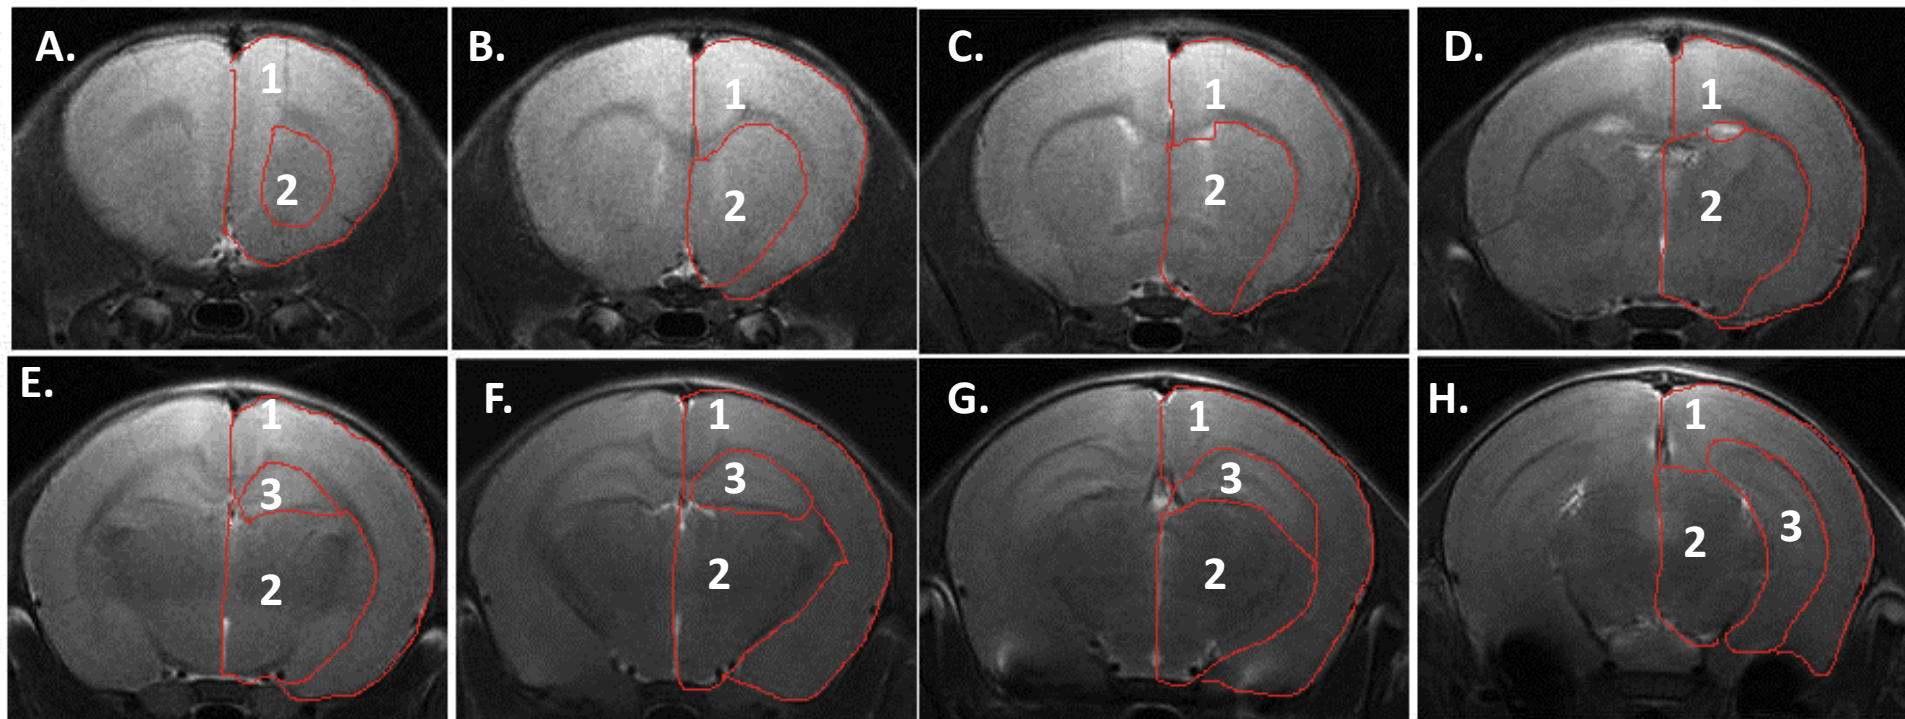

Supplemental Figure 2B. Individual regional areas were measured in the same 8 sequential images, 1 mm apart by tracing regions of interest (ROI) with Image J software (NIH, Bethesda, MD). ROI definitions are: 1) cortex; 2) Thalamus and striatum, including hypothalamus; 3) hippocampus. The volume represented by the areas from each set of 8 sections was calculated as:  
Volume = (1 mm) x (Sum of area normal tissue).

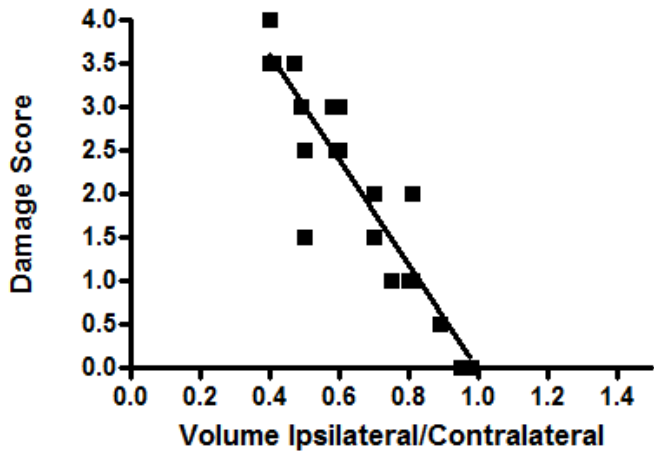

Supplemental Figure 2 (online): **Damage score (DS) and volume determinations from T<sub>2</sub>-weighted images.**

**C.** Comparison of volume measurements and gross damage scores from MRIs of each animal at 2 weeks of recovery, plotted as linear regression of hemispheric volume ratio, Ipsilateral (I)/Contralateral (C) vs DS. N=25,  $r^2 = 0.847$ .

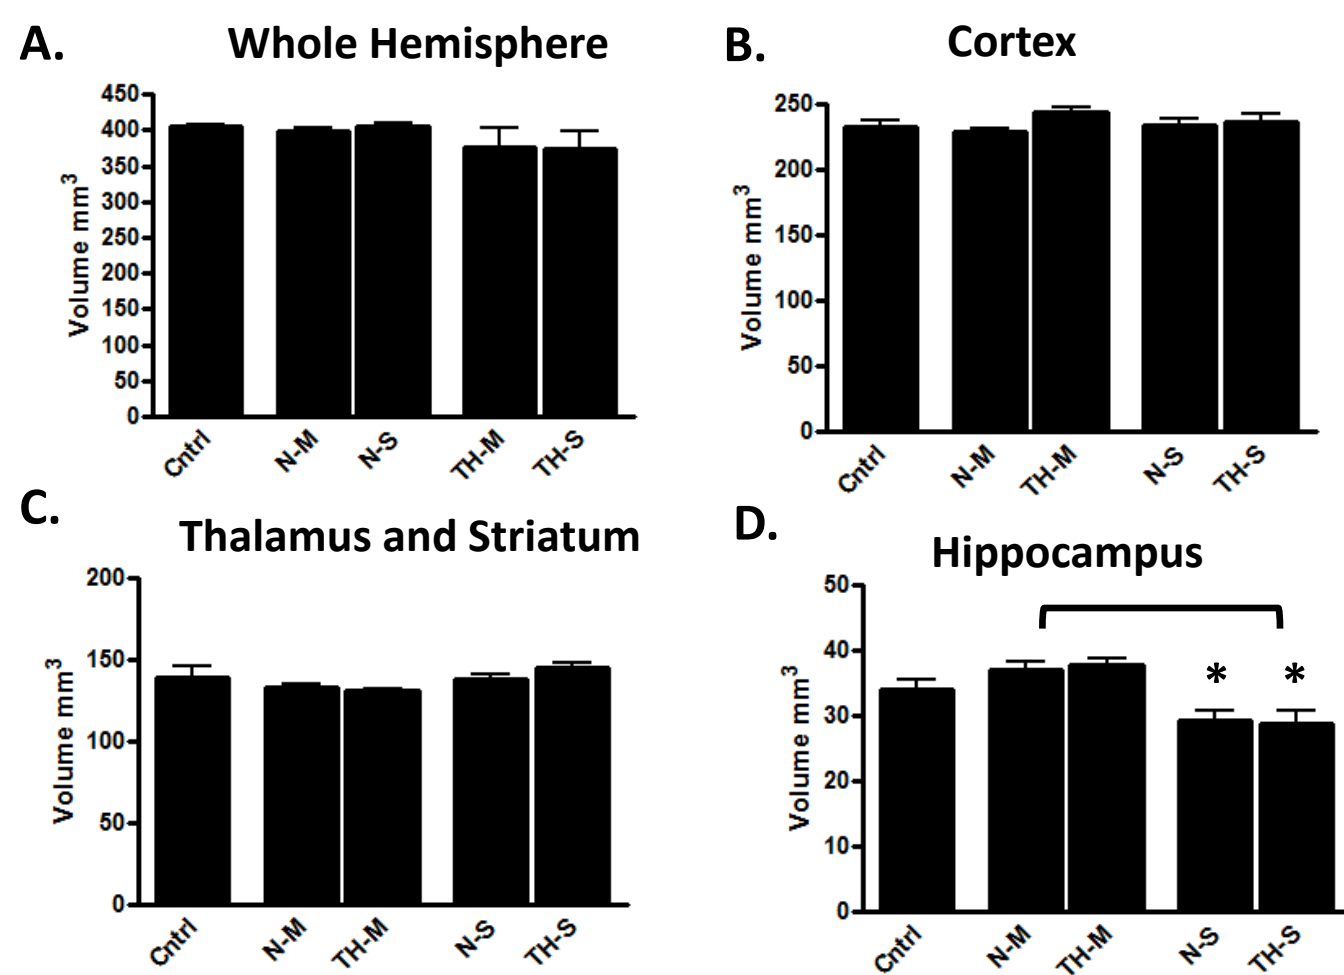

Supplemental Figure 3 (online): **Effect of hypoxia-ischemia and therapeutic hypothermia on the volume of the contralateral hemisphere in moderately and severely damaged animals at 2 weeks of recovery.** Hemispheric and regional volumes were determined from the summation of areas from 8 coronal sections of T<sub>2</sub>-weighted images as described in Methods and depicted in supplemental figure 2B (online) and depicted with the corresponding volumes for age-matched naïve controls: A, whole hemisphere; B, cortex; C, Thalamus/striatum (includes hypothalamus), D, Hippocampus. Contralateral hippocampal volume in severe animals was significantly less than in corresponding moderate animals, \*  $p < 0.001$  (unpaired t test). Cntrl, naïve control,  $n=3$ ; N-M, normothermia-moderate,  $n=22$ ; TH-M, therapeutic hypothermia-moderate,  $n=22$ ; N-S, normothermia severe,  $n=11$ ; TH-S, therapeutic hypothermia-severe,  $n=11$ .

**A.**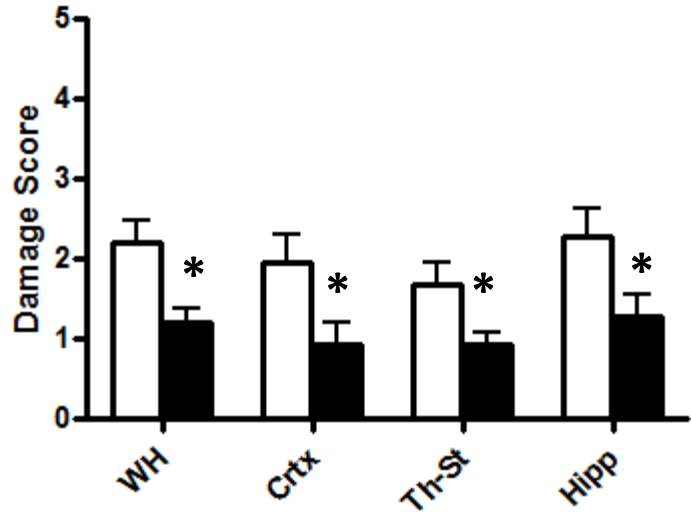**B.**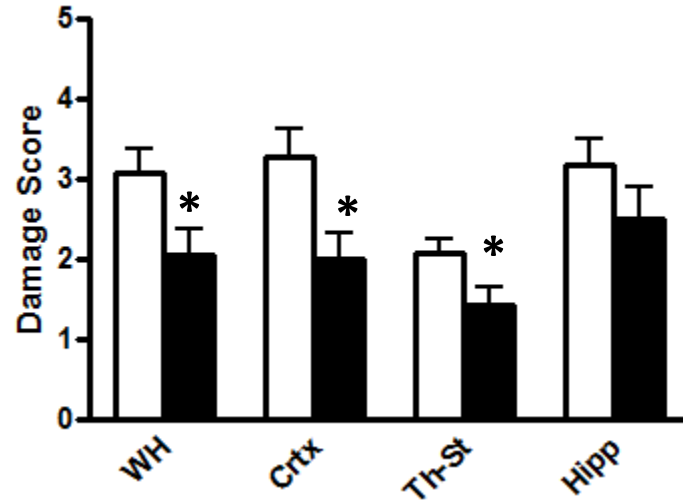

Supplemental Figure 4 (Online): **Regional DS determined at 2 weeks from T<sub>2</sub>-MRI.** Ordinal values for whole hemisphere (WH) and individual regions were determined from 2 week MRIs as detailed in Methods for **A:** Moderate and **B:** Severe cohorts. Crtx, Cortex; Th-St, Thalamus +hypothalamus and striatum; Hipp, Hippocampus. For Normothermic (white bars) and Hypothermic (black bars). \*  $p < 0.05$ , unpaired t-test.

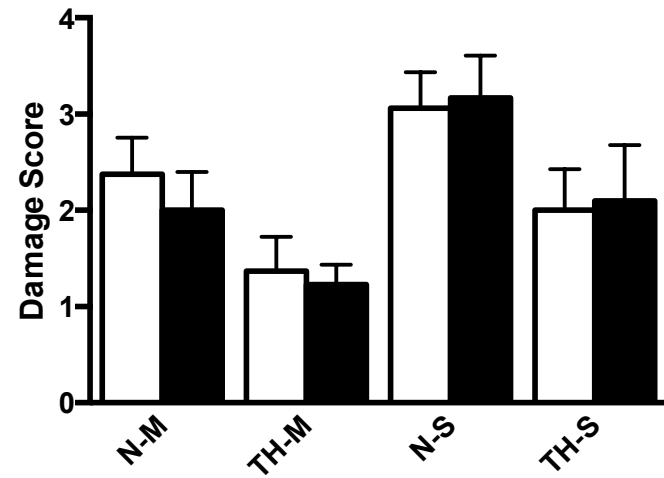

Supplemental Figure 5 (online): **Sex does not affect HI-induced damage or protection with hypothermia.** Two week damage scores determined from  $T_2$ -weighted MRI images depicted separately for male (white bars) and female (black bars) rats with no significant differences observed by sex (ANOVA). N-M, normothermia-moderate, male,  $n=12$ , female,  $n=9$ ; TH-M, therapeutic hypothermia-moderate, male,  $n=9$ , female,  $n=12$ ; N-S, normothermia-severe, male,  $n=6$ , female, 3; TH-S, therapeutic hypothermia-severe, male,  $n=6$ , female,  $n=5$ .
